# Supplementary material
Source: HighWire-hosted journal article supplement (https://bjgpopen.org/highwire/filestream/4196/field_highwire_adjunct_files/0/EL_10.3399BJGPO.2021.0043_supp_v2.pdf)
Supplement: EL_10.3399BJGPO.2021.0043_supp_v2.pdf [file EL_10.3399BJGPO.2021.0043_supp_v2.pdf]

## Experiences of OOH task-shifting from GPs: Systematic review of qualitative studies.

---

Emily Lyness, General Practitioner Academic Clinical Fellow<sup>1</sup>

Jennifer Parker, Medical student<sup>1</sup>

Merlin Willcox, General Practitioner and Clinical Lecturer<sup>1</sup>

Hajira Dambha-Miller, General Practitioner and Clinical Lecturer<sup>1</sup>

---

### Supplementary Table S1 - Example search strategy

---

Search Name: **FINAL VERSION COCHRANE**

Date Run: 19/10/2020 13:11:43

Comment:

| ID  | Search                                                                                                                                                                                            | Hits  |
|-----|---------------------------------------------------------------------------------------------------------------------------------------------------------------------------------------------------|-------|
| #1  | MeSH descriptor: [Nursing] explode all trees                                                                                                                                                      | 3263  |
| #2  | MeSH descriptor: [Nurse Practitioners] explode all trees                                                                                                                                          | 299   |
| #3  | MeSH descriptor: [Allied Health Personnel] explode all trees                                                                                                                                      | 1162  |
| #4  | MeSH descriptor: [Community Health Nursing] explode all trees                                                                                                                                     | 345   |
| #5  | "nurse*" OR "nurse practitioner*"                                                                                                                                                                 | 19661 |
| #6  | "Allied health personnel" OR "pharmacist*" OR "paramedic*" OR "physician assistant*"                                                                                                              | 5038  |
| #7  | "Community health nursing":ti,ab                                                                                                                                                                  | 34    |
| #8  | MeSH descriptor: [Nurse's Role] explode all trees                                                                                                                                                 | 318   |
| #9  | MeSH descriptor: [Delegation, Professional] explode all trees                                                                                                                                     | 4     |
| #10 | "Nurse led" or "nurse managed" or "nurse management" or "nurse run" or "nurse delivered":ti,ab                                                                                                    | 2251  |
| #11 | ("Role" OR "competence" OR "performance" OR "skill*") near nurs*                                                                                                                                  | 2068  |
| #12 | "Substitut*" or "delegat*" or "task shift" or "task-shift" or "task-shifting" and "nurse" or "nurses":ti,ab                                                                                       | 12686 |
| #13 | #1 or #2 or #3 or #4 or #5 or #6 or #7 or #8 or #9 or #10 or #11 or #12                                                                                                                           | 33498 |
| #14 | MeSH descriptor: [General Practitioners] explode all trees                                                                                                                                        | 271   |
| #15 | MeSH descriptor: [Physicians, Primary Care] explode all trees                                                                                                                                     | 152   |
| #16 | MeSH descriptor: [Primary Health Care] explode all trees                                                                                                                                          | 7209  |
| #17 | MeSH descriptor: [Family Practice] explode all trees                                                                                                                                              | 1971  |
| #18 | MeSH descriptor: [Community Medicine] explode all trees                                                                                                                                           | 37    |
| #19 | MeSH descriptor: [Home Care Services] explode all trees                                                                                                                                           | 2413  |
| #20 | "General next practitioner*" OR "GP*" OR "family next practitioner*"                                                                                                                              | 10277 |
| #21 | "family practice"                                                                                                                                                                                 | 4148  |
| #22 | "Primary care" OR "primary healthcare" OR "primary health care" OR "primary next practice*" OR "general next practice*" OR "community care*" OR "community next health*" OR "community medicine*" | 27047 |
| #23 | #14 or #15 or #16 or #17 or #18 or #19 or #20 or #21 or #22                                                                                                                                       | 42511 |
| #24 | MeSH descriptor: [After-Hours Care] explode all trees                                                                                                                                             | 30    |

- #25 MeSH descriptor: [Ambulatory Care] explode all trees 3623
- #26 "Out of hours near care" OR "out of hours" OR "out-of-hours" OR "OOH" OR "After hours near care" OR "after-hours near care" OR "Ambulatory care" OR "Urgent care" OR "unscheduled care" OR "telephone consultation\*" OR "home visit" 7187
- #27 #24 or #25 or #26 7653
- #28 MeSH descriptor: [Qualitative Research] explode all trees 1040
- #29 MeSH descriptor: [Interview] explode all trees 7
- #30 MeSH descriptor: [Systematic Reviews as Topic] explode all trees 17
- #31 MeSH descriptor: [Randomized Controlled Trials as Topic] explode all trees 14512
- #32 MeSH descriptor: [Narrative Medicine] explode all trees 5
- #33 MeSH descriptor: [Meta-Analysis as Topic] explode all trees 308
- #34 MeSH descriptor: [Evidence-Based Practice] explode all trees 1224
- #35 MeSH descriptor: [Observational Studies as Topic] explode all trees 49
- #36 MeSH descriptor: [Comparative Effectiveness Research] explode all trees 281
- #37 "qualitative systematic review\*" OR "systematic review and qualitative" OR "evidence synthesis" OR "realist synthesis" OR "realist review" OR "qualitative and synthesis" OR "meta-synthesis\*" OR "meta synthesis\*" OR "metasynthesis" OR "meta-ethnograph\*" OR "metaethnograph\*" OR "meta ethnograph\*" OR "meta-study" OR "meta study" OR "meta study" OR "systematic review\*" OR "qualitative research" 18637
- #38 "grounded theory" OR "interviews as topic" OR "focus groups" OR "narration" OR "personal narratives as topic" OR "qualitative" OR "interview\*" OR "participant observation" OR "observational method" OR "story" OR "stories" OR "grounded theory" OR "ethnography" OR "phenomenolog\*" OR "thematic" OR "content" OR "conversation\*" OR "discourse" near "analysis" OR "mixed method" OR "constant comparative method" 1694261
- #39 #28 or #29 or #30 or #31 or #32 or #33 or #34 or #35 or #36 or #37 or #38 1694269
- #40 #13 and #23 and #27 and #39 **(576)**
- 
-

# Supplementary Figure S1 – PRISMA Diagram

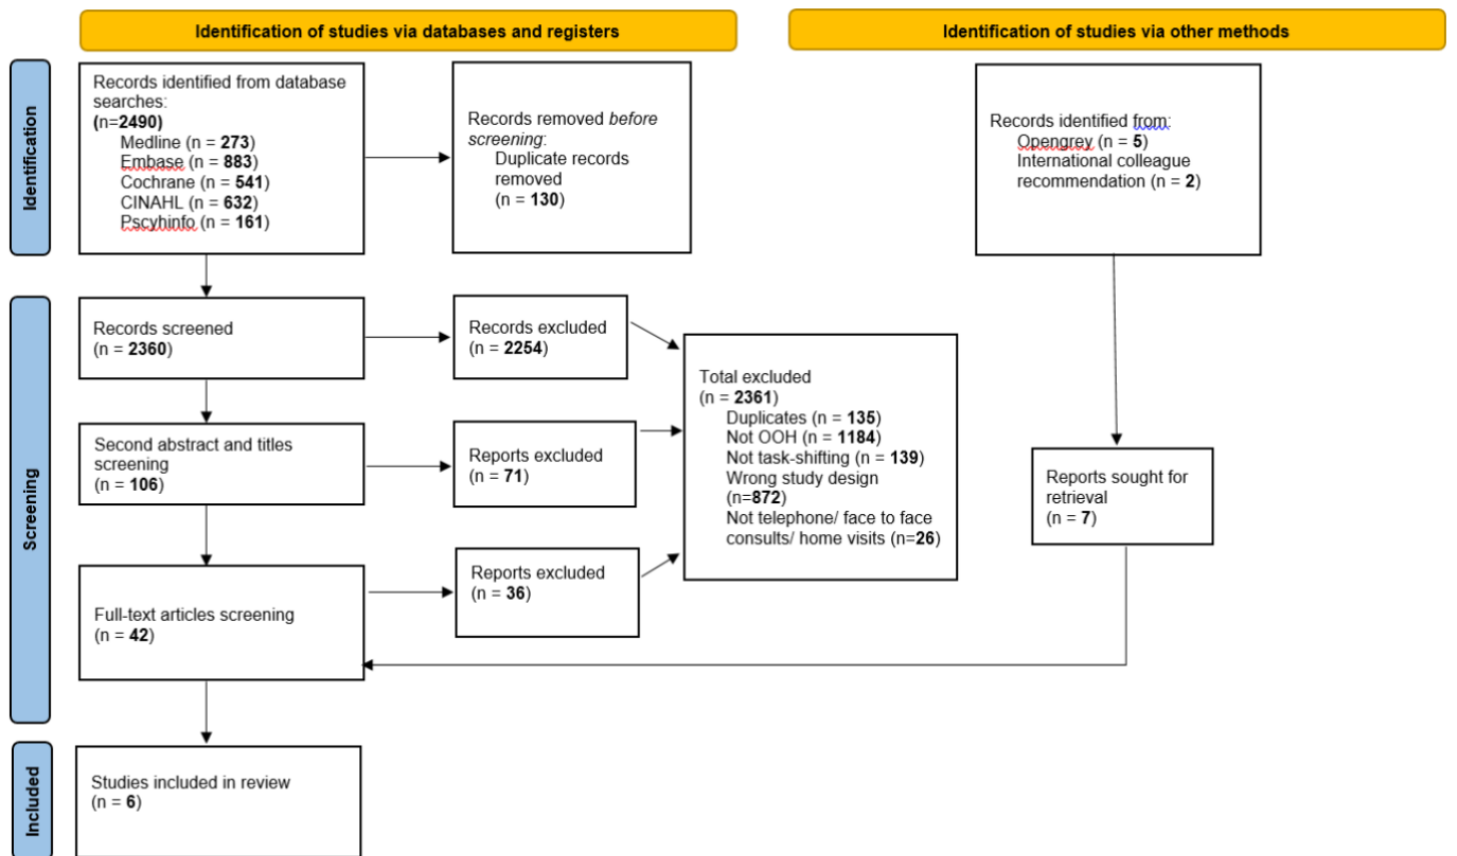

Supplementary Table S2 – Characteristics of studies

| <b>Reference</b>            | <b>Country</b>  | <b>OOH service</b>                | <b>OOH tasks</b>                                | <b>Participants in individual interviews</b>         | <b>Participants in focus groups</b> | <b>Research questions</b>                                                                                                                                                      |
|-----------------------------|-----------------|-----------------------------------|-------------------------------------------------|------------------------------------------------------|-------------------------------------|--------------------------------------------------------------------------------------------------------------------------------------------------------------------------------|
| <i>Collins 2019</i>         | England         | Cumbria Health On Call            | Home visits                                     | 6 ANPs                                               | 8 GPs                               | To understand the perceptions of the ANP home visit role amongst the ANPs themselves and the GPs working alongside them.                                                       |
| <i>Farmer 2011</i>          | Scotland        | Four NHS boards                   | Face to face consultations                      | 3 PAs working in OOH                                 | <i>Unspecified</i>                  | To evaluate the impact and contribution made by PAs to delivering effective health care                                                                                        |
| <i>Moule 2018</i>           | England         | Brisdoc Healthcare services       | Telephone triage and face to face assessment    | 2 paramedic students and 1 medical director          | 0                                   | To explore expectations and experiences of the paramedic training programme                                                                                                    |
| <i>Lindberg 2021</i>        | Norway          | Several out-of-hours cooperatives | Telephone triage                                | 0                                                    | 22 nurses                           | To explore how nurses assess callers with mild-to-moderate symptoms of respiratory tract infections and their views and experiences on triaging and counselling these callers. |
| <i>van der Biezen, 2017</i> | The Netherlands | One GP cooperative                | Face to face consultations at the health centre | 14 GPs, 4 NPs, 5 medical assistants, 4 receptionists | 11 NPs                              | To identify the factors influencing collaboration between GPs and NPs in out-of-hours teams.                                                                                   |
| <i>Yuill 2018</i>           | England         | Brisdoc Healthcare Services       | Not specified                                   | 5 ANPs                                               | 0                                   | To explore the role and experiences of ANPs working OOH to support service improvement and to develop                                                                          |

|  |  |  |  |  |  |                                                      |
|--|--|--|--|--|--|------------------------------------------------------|
|  |  |  |  |  |  | support and education for ANPs working in this field |
|--|--|--|--|--|--|------------------------------------------------------|

Supplementary Table S3 – CASP assessment of studies

| Q | CASP Medline Questions                                                               | Collins 2019 | Farmer 2011 | Moule 2018 | Yuill 2018 | Van der Biezen 2017 | Linberg 2021 |
|---|--------------------------------------------------------------------------------------|--------------|-------------|------------|------------|---------------------|--------------|
| 1 | Was there a clear statement of the aims of the research?                             | YES          | YES         | YES        | YES        | YES                 | YES          |
| 2 | Is a qualitative methodology appropriate?                                            | YES          | YES         | YES        | YES        | YES                 | YES          |
| 3 | Was the research design appropriate to address the aims of the research?             | YES          | YES         | YES        | YES        | YES                 | YES          |
| 4 | Was the recruitment strategy appropriate to the aims of the research?                | YES          | CAN'T TELL  | CAN'T TELL | CAN'T TELL | YES                 | YES          |
| 5 | Was the data collected in a way that addressed the research issue?                   | YES          | NO          | YES        | YES        | YES                 | YES          |
| 6 | Has the relationship between researcher and participants been adequately considered? | YES          | NO          | NO         | CAN'T TELL | CAN'T TELL          | YES          |
| 7 | Have ethical issues been taken into consideration?                                   | YES          | YES         | YES        | YES        | YES                 | NO           |
| 8 | Was the data analysis sufficiently rigorous?                                         | YES          | NO          | CAN'T TELL | CAN'T TELL | YES                 | YES          |
| 9 | Is there a clear statement of findings?                                              | YES          | YES         | YES        | YES        | YES                 | YES          |

| <b>Question 10 – How valuable is the research?</b>                                                                                                                                                                                        |                                                                                                                                                                                                                                                                       |                                                                                                                                                                                                                                                                          |                                                                                                                                                                                                      |                                                                                                                                                                                                   |                                                                                                                                                                                                                                                                             |
|-------------------------------------------------------------------------------------------------------------------------------------------------------------------------------------------------------------------------------------------|-----------------------------------------------------------------------------------------------------------------------------------------------------------------------------------------------------------------------------------------------------------------------|--------------------------------------------------------------------------------------------------------------------------------------------------------------------------------------------------------------------------------------------------------------------------|------------------------------------------------------------------------------------------------------------------------------------------------------------------------------------------------------|---------------------------------------------------------------------------------------------------------------------------------------------------------------------------------------------------|-----------------------------------------------------------------------------------------------------------------------------------------------------------------------------------------------------------------------------------------------------------------------------|
| Collins 2019                                                                                                                                                                                                                              | Farmer 2011                                                                                                                                                                                                                                                           | Moule 2018                                                                                                                                                                                                                                                               | Yuill 2018                                                                                                                                                                                           | Van der Biezen 2017                                                                                                                                                                               | Linberg 2021                                                                                                                                                                                                                                                                |
| There is discussion about the contribution the study makes to the existing understanding about ANPs successful at task-shifting. Implications for practice are suggested. Further research suggestions and policy and practice guidelines | There is discussion about the contribution the study makes to the existing understanding about PAs in task-shifting roles. Recommendations for the future employment role of PAs are made. Suggestions made for future practice that ANPs could also fulfil this role | There is discussion about the contribution the study makes to the existing knowledge of training paramedics in OOH. The training was declared a success and a valuable learning contribution to OOH organisations. Limited discussion of findings in relation to current | There is discussion about the contribution the study makes to the existing knowledge of ANP OOH training. Relevant literature is discussed but there is minimal recommendations for further research | There is discussion about the contribution the study makes to the existing understanding of ANPs within the OOH team. Relevant literature is discussed, as is the transferability of the results. | There is discussion about the contribution the study to the understanding of ANP triage and relevant to existing literature. Recommendations are made for organisational aspects of Nurse triage in OOH. No further research recommendations made, Transferability implied. |

|                       |  |                                                                             |  |                                                    |  |
|-----------------------|--|-----------------------------------------------------------------------------|--|----------------------------------------------------|--|
| suggestions are made. |  | literature, policy and practice<br>No suggested research areas highlighted. |  | Minimal recommendations made for further research. |  |
|-----------------------|--|-----------------------------------------------------------------------------|--|----------------------------------------------------|--|

Supplementary Figure S2 – Theme configuration

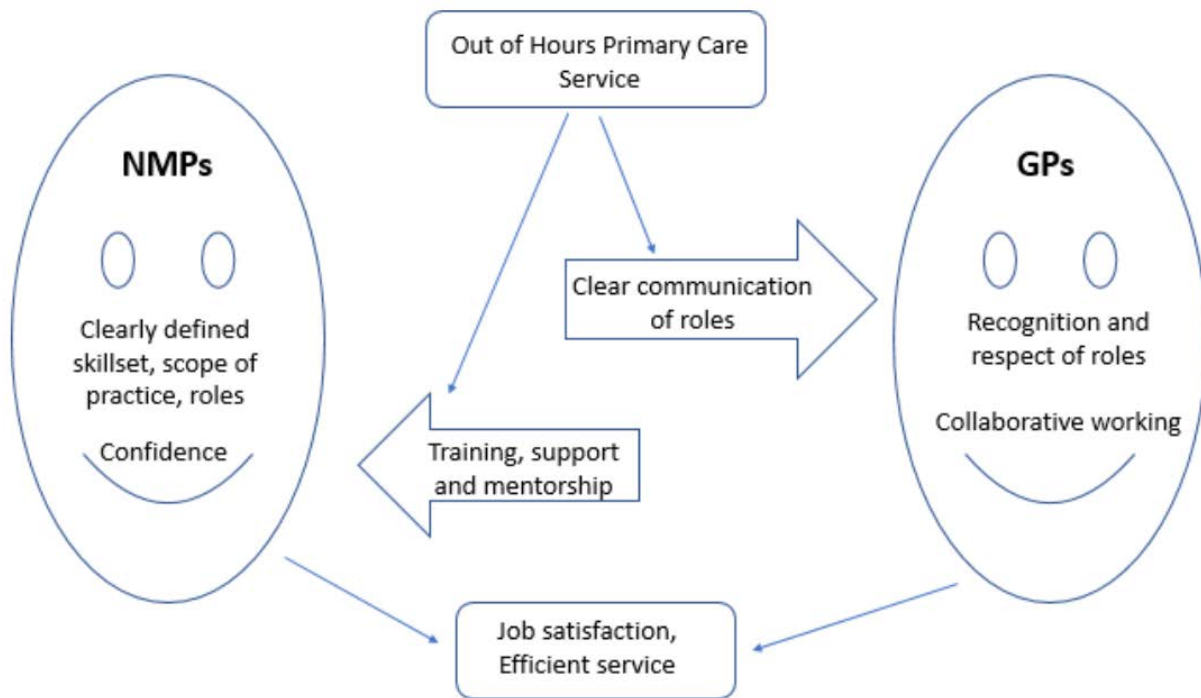

Supplementary Table S4 – Additional illustrative quotes

| Theme/ Sub-theme                                                       | Quote                                                                                                                                                                                                                                                                                                                                                   | Reference           |
|------------------------------------------------------------------------|---------------------------------------------------------------------------------------------------------------------------------------------------------------------------------------------------------------------------------------------------------------------------------------------------------------------------------------------------------|---------------------|
| Theme 1 - Clearly defined skillset, scope of practice and role of NMPs |                                                                                                                                                                                                                                                                                                                                                         |                     |
| 1.1 Defining scope of practice and role                                | “It’s important to be very specific to GPs about what patients we don’t treat. Often they say ‘Oh yeah, I know,’ but turns out they don’t know it at all.” (ANPs in OOH cooperative)                                                                                                                                                                    | van der Biezen 2017 |
|                                                                        | There were restrictions to patient conditions seen by the [A]NPs, including no children, limited mental illness, no confirmation of death and no pregnancy-related problems. (GP talking about ANP home visiting)                                                                                                                                       | Collins 2019        |
|                                                                        | Current UK legislation prohibits PA prescribing...this was reported as more of a hindrance in the out of hours clinic compared to other settings.                                                                                                                                                                                                       | Farmer 2011         |
|                                                                        | Several participants [ANPs] highlighted perceptions about ANPs’ competency compared with that of GPs. For example, they experienced difficulties making referrals to secondary care and were asked if a GP had assessed patients before admission. There was a sense that ANPs needed to be more assertive about their abilities when making referrals. | Yuill 2018          |

|                                                                                     |                                                                                                                                                                                                                                                                                                                                                                                                                                           |                     |
|-------------------------------------------------------------------------------------|-------------------------------------------------------------------------------------------------------------------------------------------------------------------------------------------------------------------------------------------------------------------------------------------------------------------------------------------------------------------------------------------------------------------------------------------|---------------------|
| 1.2 Recognition of non-medical practitioners' skillset and role                     | Often, these GPs expressed misconceptions about [A]NPs' education and legislation governing NP scope of practice. (GP in OOH cooperative).                                                                                                                                                                                                                                                                                                | van der Biezen 2017 |
|                                                                                     | Most interviewees reported PAs working at a 'mid-level', similar to a nurse practitioner or a doctor in training. Level of working depended on whether there were gaps in the team [and] the extent to which the PA could extend their practice.                                                                                                                                                                                          | Farmer 2011         |
|                                                                                     | Like having another doctor but they also bring all the nursing side". "We tend to see them all as equal, but they do have different experiences and abilities (GP talking about ANP home visiting).                                                                                                                                                                                                                                       | Collins 2019        |
|                                                                                     | The ANPs felt that, although they were replacing GPs in the home visits, as nurses they brought a "caring perspective" and saw things from "a wider viewpoint" than some doctors. Their creative, patient, family-inclusive decision making, and communication skills were also mentioned as key to their role. (GP talking about ANP home visiting).                                                                                     | Collins 2019        |
| <i>Theme 2 – NMP confidence</i>                                                     |                                                                                                                                                                                                                                                                                                                                                                                                                                           |                     |
| 2.1 NMP confidence is critical for an efficient service                             | Some of the informants described a constant uncertainty concerning their own assessment of callers. This feeling of uncertainty could remain for hours after their shift ended. They feared having missed symptoms indicating grave disease or they feared an unexpected and serious infection. Their previous experiences with the unpredictable and abrupt progress of disease contributed to this fear ([A]NP doing telephone triage). | Lindberg 2021       |
|                                                                                     | I think we [ANPs} are more anxious about making mistakes, due to the vulnerable position of NPs in a relatively new profession. (ANP in OOH cooperative)                                                                                                                                                                                                                                                                                  | van der Biezen 2017 |
|                                                                                     | Both [paramedic students] felt their ability to respond to a wide range of conditions might be compromised by gaps in their knowledge, and having access to GPs to verify decisions was reassuring.                                                                                                                                                                                                                                       | Moule 2018          |
| 2.2 Training, clinical support and mentorship help to build confidence and autonomy | Further learning and knowledge is required to work OOH...there is a 'big gap of learning for nurses and paramedics when you start in the acute setting'                                                                                                                                                                                                                                                                                   | Yuill 2018          |
|                                                                                     | GPs stated a need for "the development of telephone triage for the ANPs [as] one important area of training" within Urgent Treatment Centres. (GP talking about ANP home visiting).                                                                                                                                                                                                                                                       | Collins 2019        |
|                                                                                     | Initial hostility to PAs by team members quickly gave way to expressions of their value to teams. Informative induction and presentations about PAs were crucial to their assimilation. Team members thought PAs provided continuity and acted as an educational resource for staff in training.                                                                                                                                          | Farmer 2011         |
|                                                                                     | We are different, but we work the same, but I do feel that it is nice knowing there is someone back at base that you can contact for support. [ANPs about home visits]                                                                                                                                                                                                                                                                    | Collins 2019        |
|                                                                                     | Participants also said shifts were often very busy with little time for quality supervision and that this can cause stress...they suggested the provision of protected time away from the working environment. An ANP working in an UTC reported positive experiences when "the same GP on every shift guided and helped.                                                                                                                 | Yuill 2018          |

|  |                                                                                                                                                                                                                                                                                                                                                      |            |
|--|------------------------------------------------------------------------------------------------------------------------------------------------------------------------------------------------------------------------------------------------------------------------------------------------------------------------------------------------------|------------|
|  | <p>When discussing autonomy, participants said they “enjoy the autonomy and not having to refer to anyone. Can examine, treat and discharge without other involvement”, and that “there is support and colleagues around, but many decisions have to be made by you. We are sat in our own room with little resource, just you and the patient”.</p> | Yuill 2018 |
|--|------------------------------------------------------------------------------------------------------------------------------------------------------------------------------------------------------------------------------------------------------------------------------------------------------------------------------------------------------|------------|
